# Supplementary material
Source: PubMed Central journal article supplement (PMC7295121)
Supplement: NIHMS1595941-supplement-Supporting_Information.pdf [file NIHMS1595941-supplement-Supporting_Information.pdf]

## Supporting Information

Full-featured, real-time database searching platform enables fast and accurate multiplexed quantitative proteomics.

Devin K. Schweppe<sup>1\*</sup>, Jimmy K. Eng<sup>2</sup>, Qing Yu<sup>1</sup>, Derek Bailey<sup>3</sup>, Ramin Rad<sup>1</sup>, Jose Navarrete-Perea<sup>1</sup>, Edward L. Huttlin<sup>1</sup>, Brian K. Erickson<sup>1</sup>, Joao A. Paulo<sup>1\*</sup>, Steven P. Gygi<sup>1\*</sup>

1 – Department of Cell Biology, Harvard Medical School, Cambridge, MA

2 – University of Washington Proteomics Resource, Seattle, WA

3 – Thermo Scientific LSMS, San Jose, CA

\* – Corresponding Authors

Correspondence should be directed to:

*Devin K Schweppe*

devin\_schweppe@hms.harvard.edu

*Joao A Paulo*

joao\_paulo@hms.harvard.edu

*Steven P Gygi*

steven\_gygi@hms.harvard.edu

Department of Cell Biology

Harvard Medical School

240 Longwood Ave

Boston, MA

### Contents

#### *Figures*

Figure S1 – Duty cycle for RTS-MS3 and SPS-MS3 workflows.

Figure S2 – Histograms comparing mass error of the theoretical matched peptide MH+ versus instrument reported precursor mass or the Orbiter-corrected monoisotopic MH+.

Figure S3 – Real-time false discovery rate (rtFDR) to separate target and decoy matches and calculate false discovery rates (FDRs) in real-time.

Figure S4 – Convergence of the LDA Score threshold.

Figure S5 – Hyper standard quantitative comparison.

Figure S6 – Scatter plots for the three cell line binary comparisons.

Figure S7 – Western blotting analysis of Endoglin (ENG).

Figure S8 – Western blotting analysis of ALPK2.

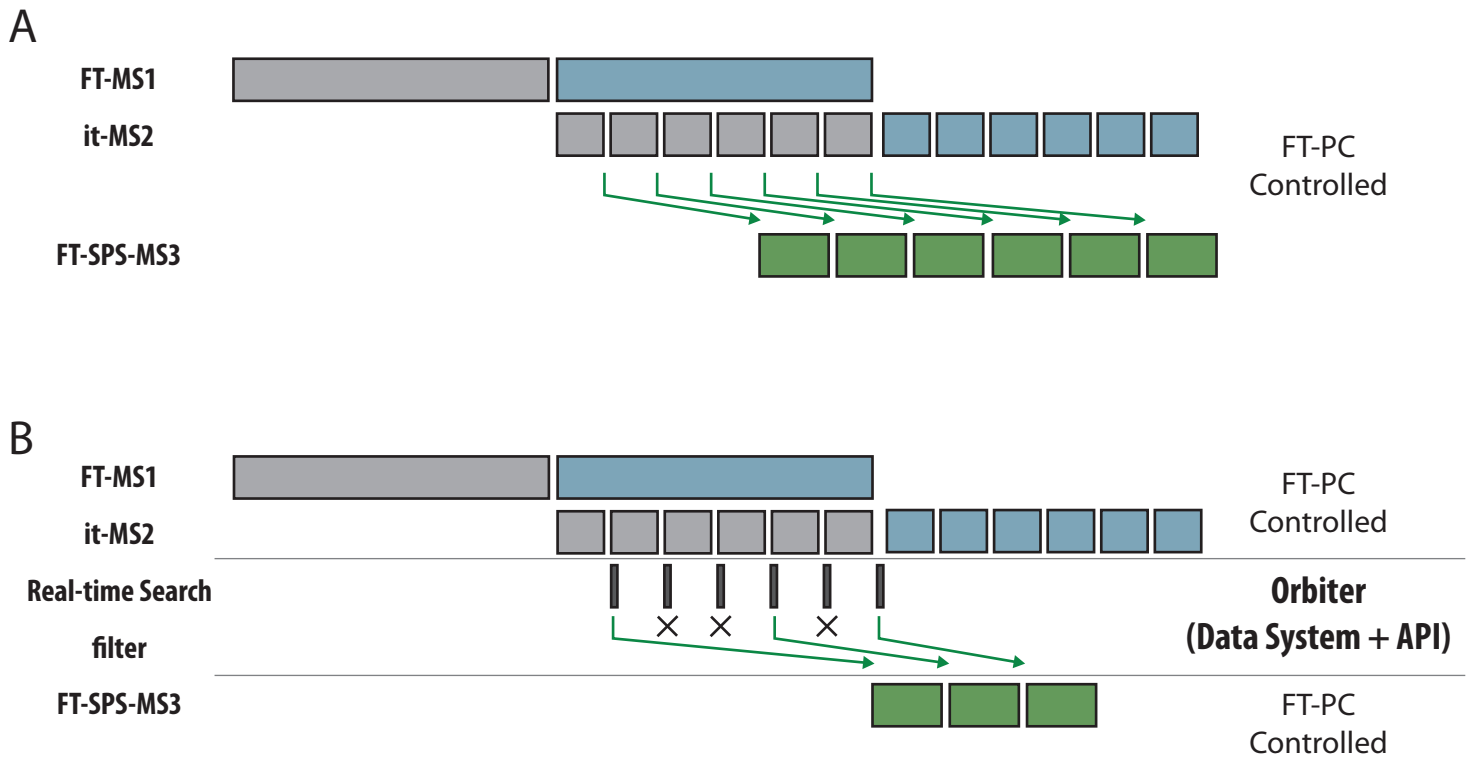

**Figure S1**

Duty cycle for RTS-MS3 and SPS-MS3 workflows. **A.** SPS-MS3 workflow. Precursors are identified in high-resolution MS1 spectrum and targeted for fragmentation and subsequent analysis in low resolution MS2 scans (ion trap [it] MS2). SPS ions are determined based on the most intense ions in the MS2 scans and for every MS2 spectrum ions are selected for further fragmentation and analysis in a third high resolution MS3 scan. **B.** RTS-MS3 workflow. Instead of selecting SPS ions for every MS2 scan, RTS-MS3 scans are only triggered when all filters (search score, rtFDR, etc) are passed. Thereby only a subset of MS2 scans trigger SPS-MS3 scans for quantitation, saving time for further MS1 and MS2 scans.

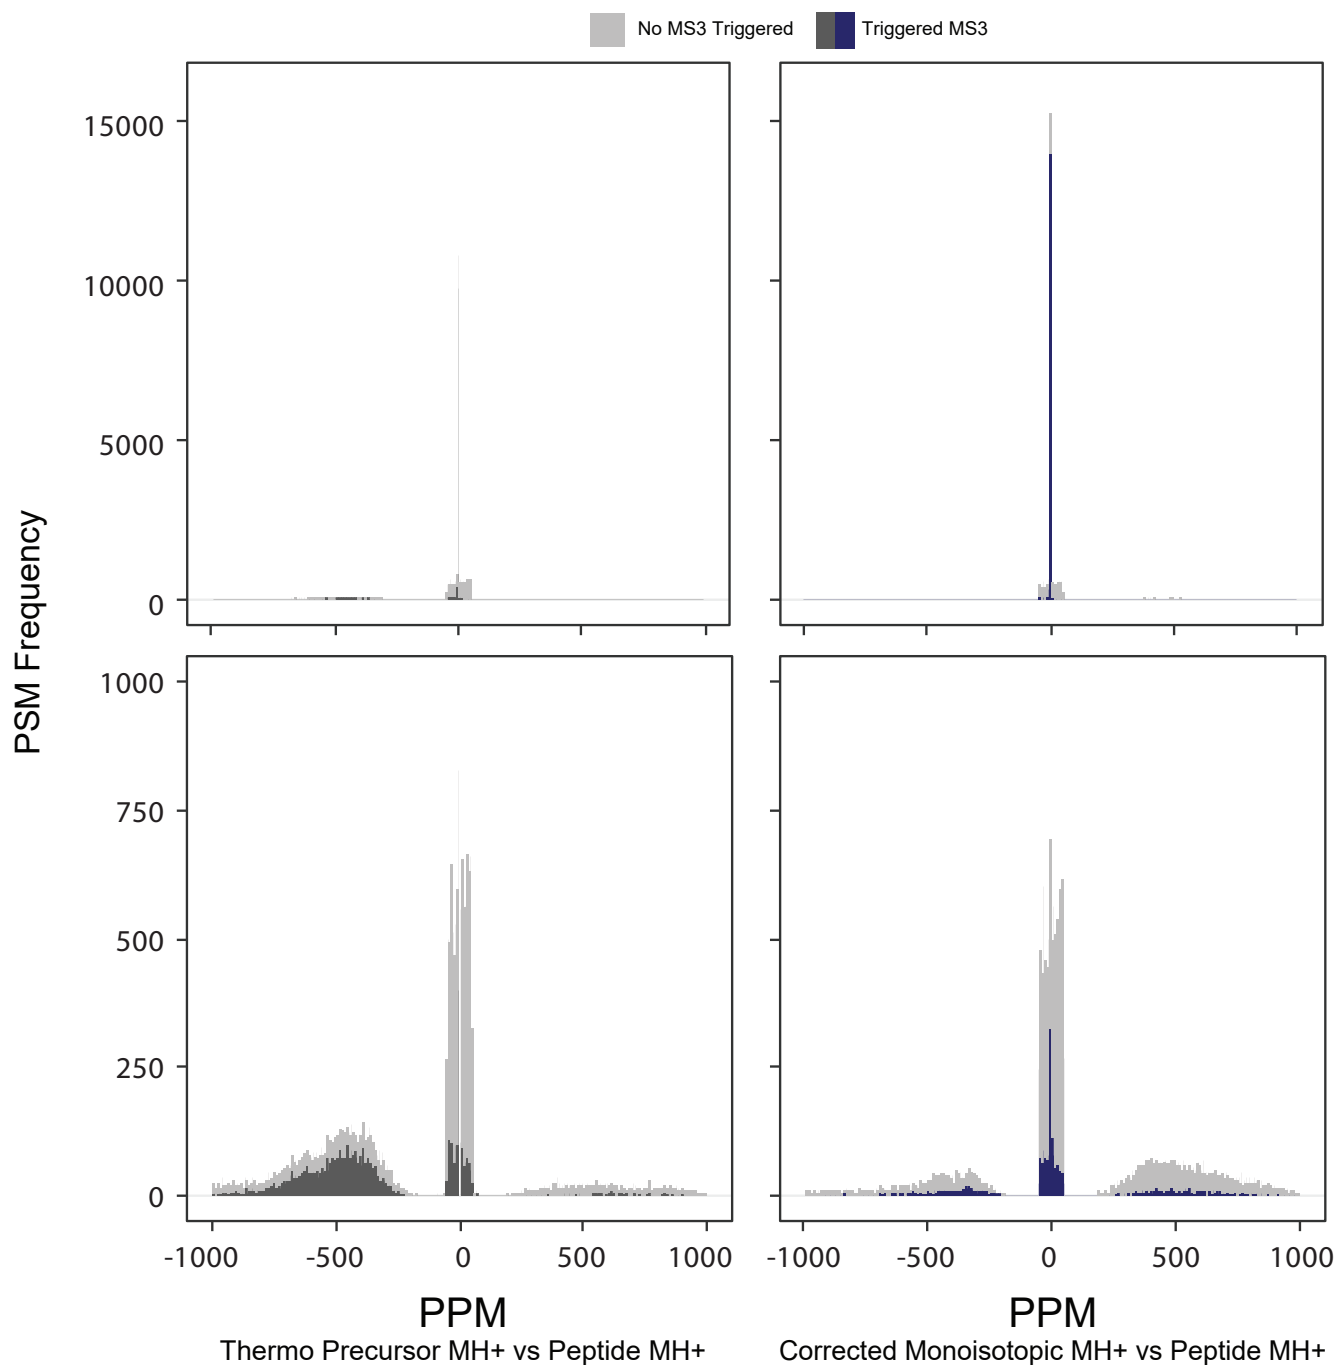

**Figure S2**

Histograms comparing mass error of the theoretical matched peptide MH+ versus instrument reported precursor mass (left panels) or the Orbiter-corrected monoisotopic MH+ (right panels). Light grey bars indicate PSMs that did not trigger RTS-MS3 scans. Dark grey and blue bars indicate PSMs that triggered RTS-MS3 scans. Bottom panels show a zoomed in version of the top panel (maximum PSM frequency of 1000); bins with frequencies greater than 1000 are not shown in these panels. Histogram bin width is 5 ppm. Monoisotopic peak correction resulted in 23% more PSMs within +/-50ppm of the theoretical peptide MH+.

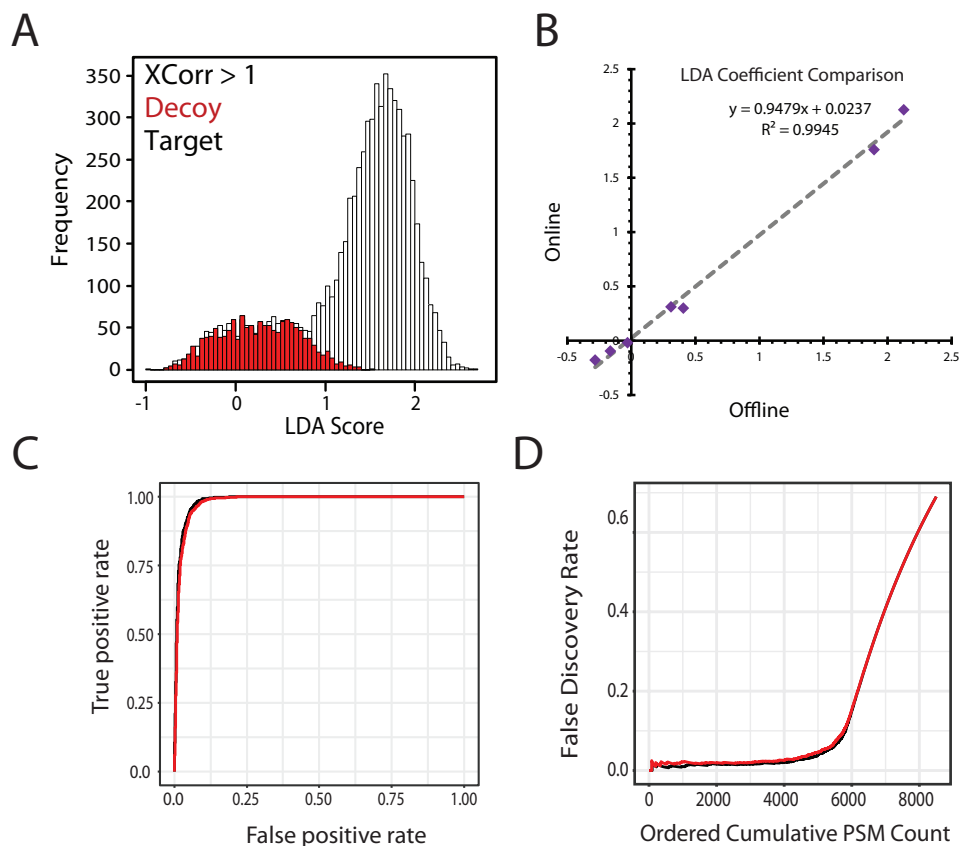

### Figure S3

Real-time false discovery rate (rtFDR). The rtFDR framework uses multidimensional linear discriminant analysis (LDA) to separate target and decoy matches and calculate false discovery rates (FDRs) in real-time with instrument scan acquisition. We observed real-time performance commensurate with offline calculation<sup>1</sup>. **A**. Separation of target and decoy peptides by LDA score based on seven peptide spectral match metrics: XCorr, deltaCorr, missed cleavages, charge state, absolute ppm error, peptide length, and the fraction of ions matched. **B**. LDA coefficients compared from offline (R, MASS implementation) and online (C# Accord) for the same TKO sample run. These data were highly correlated. **C**. Receiver operator curve for offline (black) and online LDA scoring (red). **D**. Cumulative FDR curves for offline (black) and online LDA scoring (red).

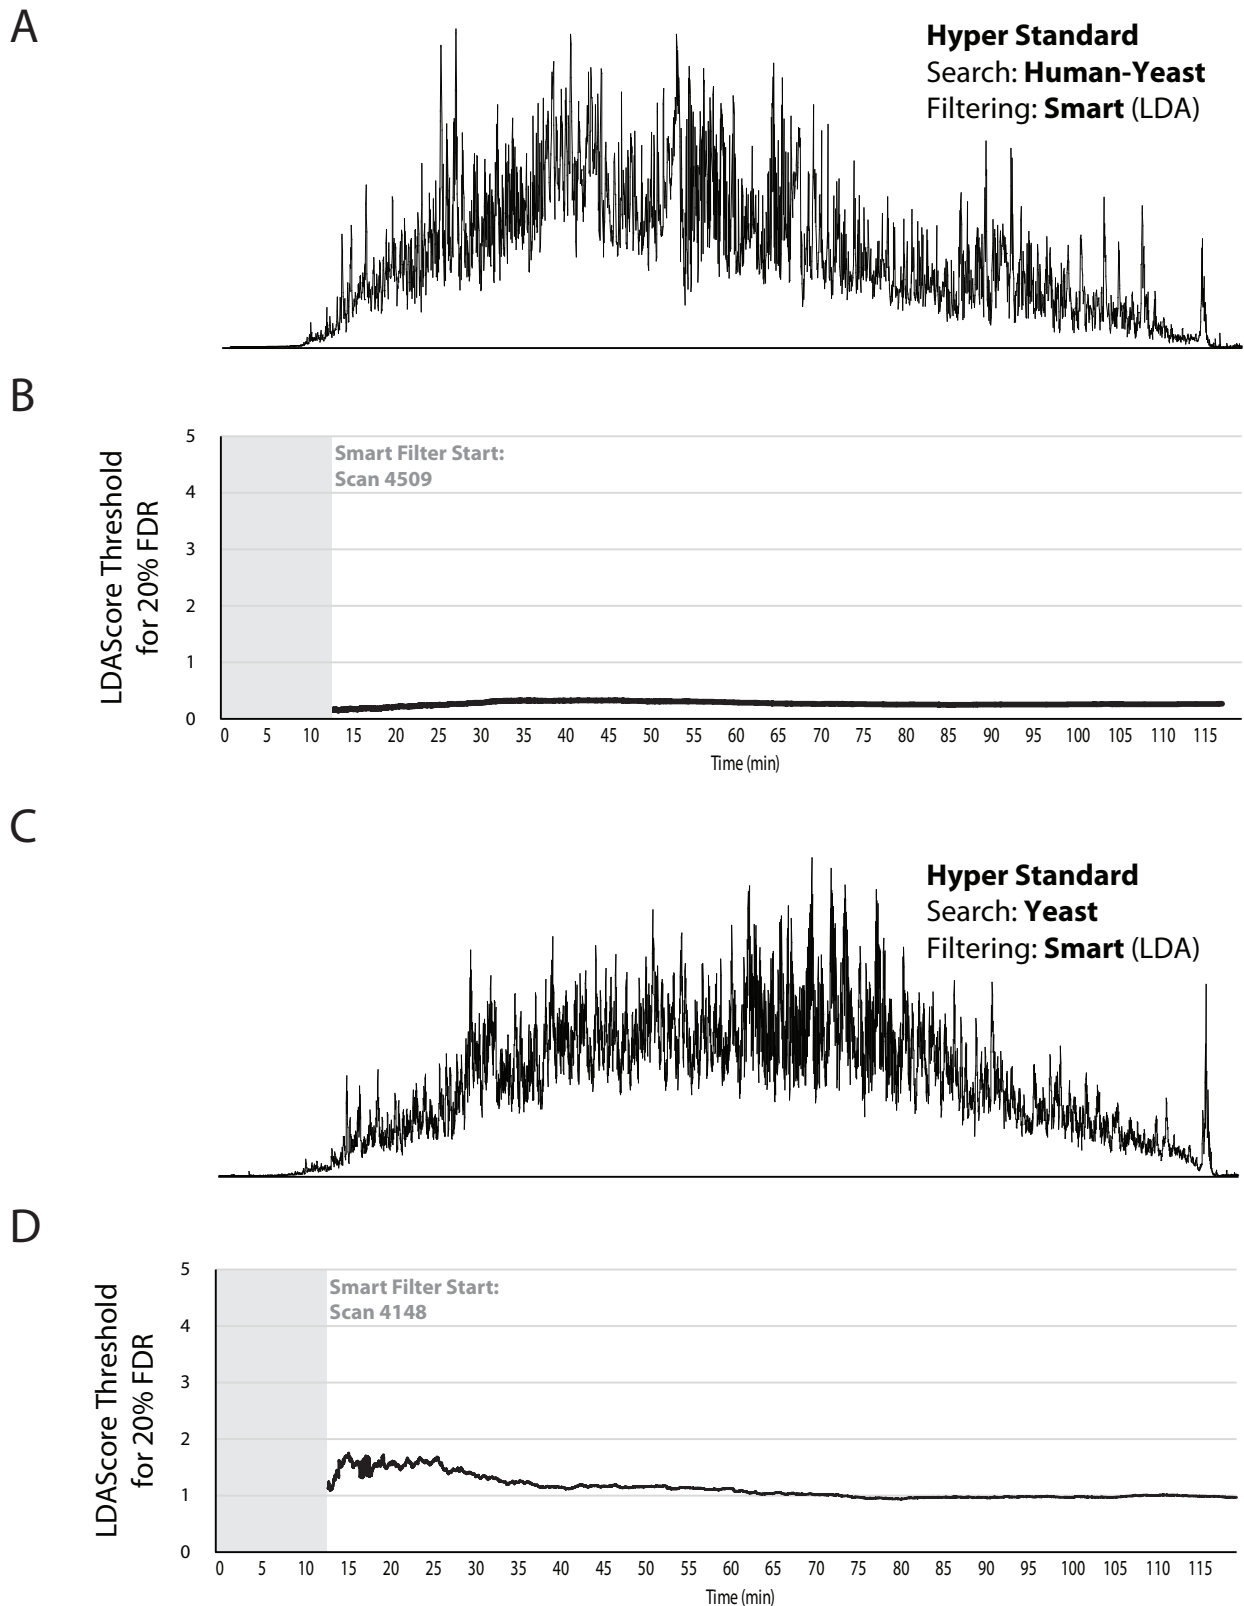

**Figure S4**

Convergence of the LDA Score threshold. **A.** Total ion chromatogram of the MS1 scans for Hyper standard eluting over a 120minute gradient. RTS used a concatenated human-yeast database. **B.** LDA Score threshold for a 20% FDR over the course of the run in **A.** **C.** Total ion chromatogram of the MS1 scans for Hyper standard eluting over a 120minute gradient. RTS used a only the yeast database. **D.** LDA Score threshold for a 20% FDR over the course of the run in **C.** The LDA Score threshold converged with either databased searching method, but converged and stabilized much faster when searching the two proteome Hyper standard with a two-proteome database.

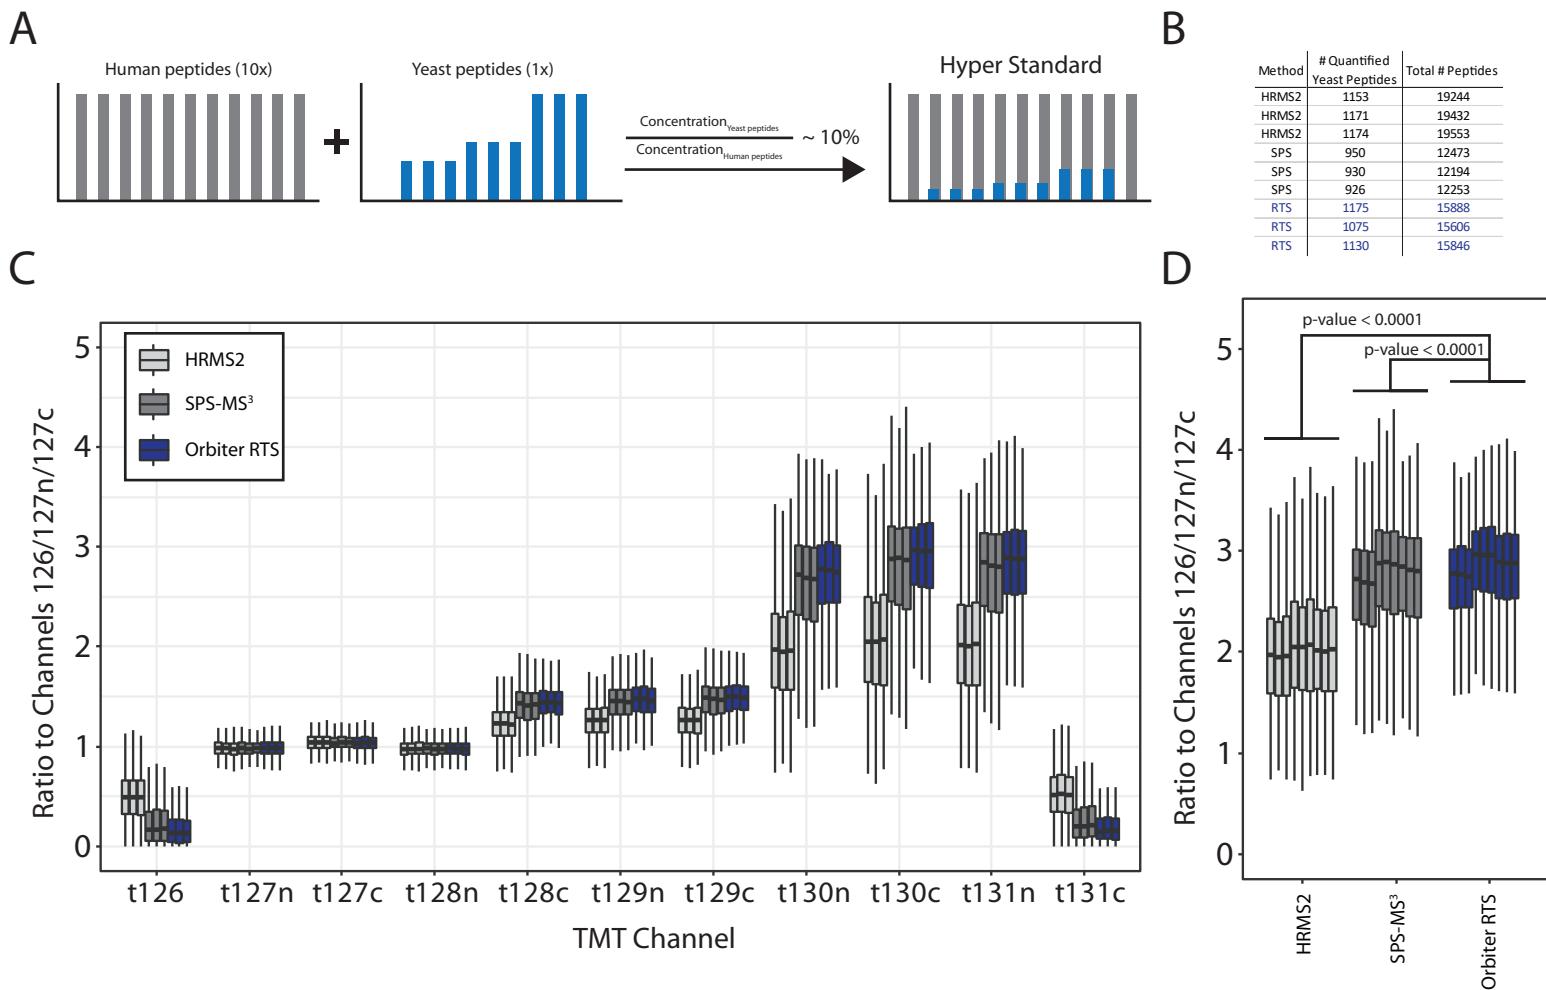

**Figure S5**

Hyper standard quantitative comparison. **A.** The Hyper standard is a two proteome mixture consisting of human and yeast peptides mixed at an approximately 10:1 ratio. The yeast peptides are distributed across TMT channels to generate multiple comparable ratios to assess quantitative accuracy (1x, 1.5x, 3x). **B.** Quantified yeast and total peptides for the three technical replicates of each method test. **C.** Boxplot of ratios for quantified yeast peptide ratios for the three technical replicates of each method. **D.** The three-fold change ratios for the RTS quantification were significantly increased (i.e. closer to 3) compared to HRMS2 and SPS-MS3 (ANOVA/Tukey).

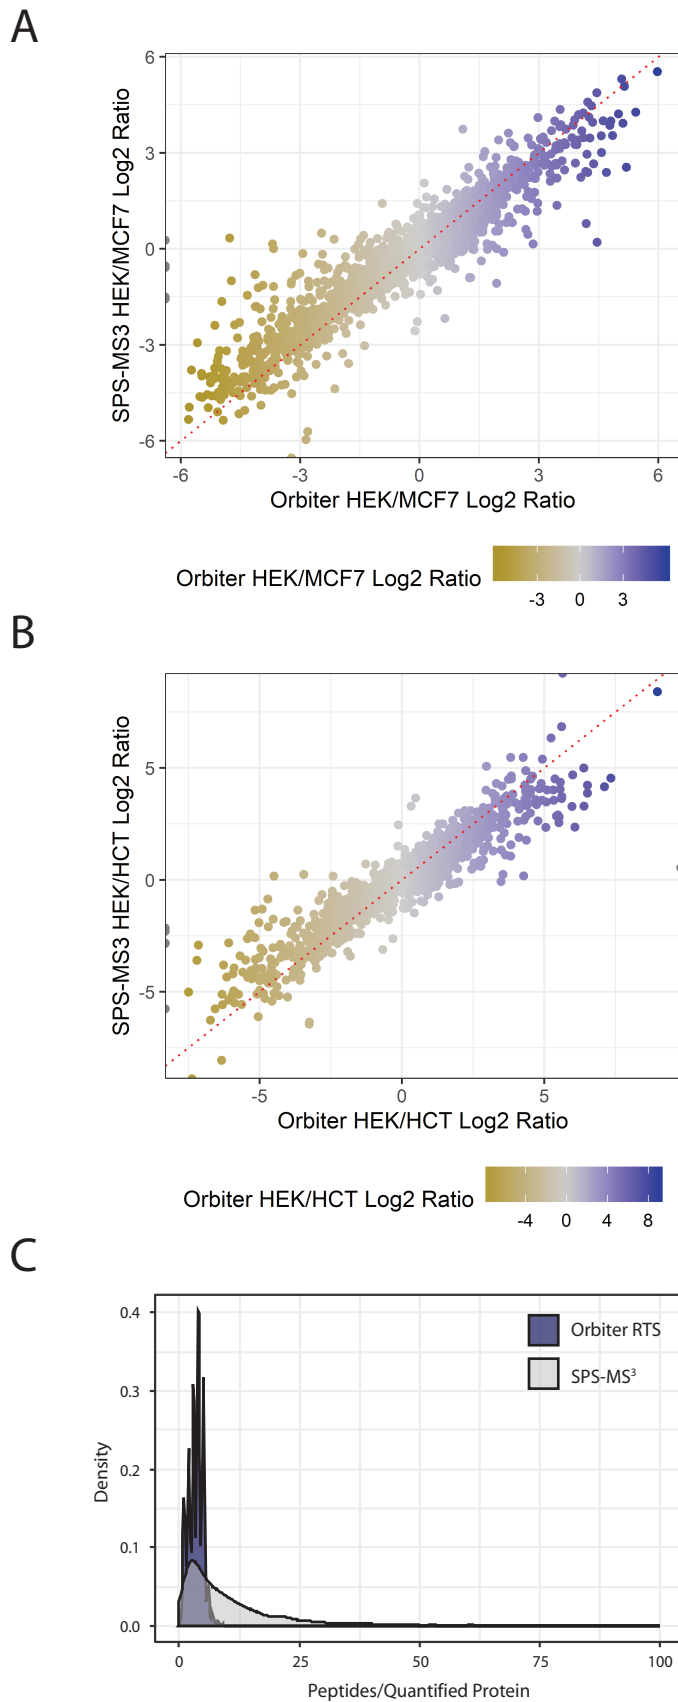

**Figure S6**

Three cell line comparison of SPS-MS3 and RTS acquisitions. Scatter plots for the three cell line binary comparisons of **A** HEK293T (HEK) versus MCF7 and **B** HEK293T (HEK) versus HCT116 (HCT). The red lines indicates the  $x = y$  regression. **C**. Quantified peptides per protein for the SPS-MS3 (grey density plot) and Orbiter RTS (blue density plot) analyses. Orbiter RTS uses a protein closeout to limit to number of peptides per run that are quantified.

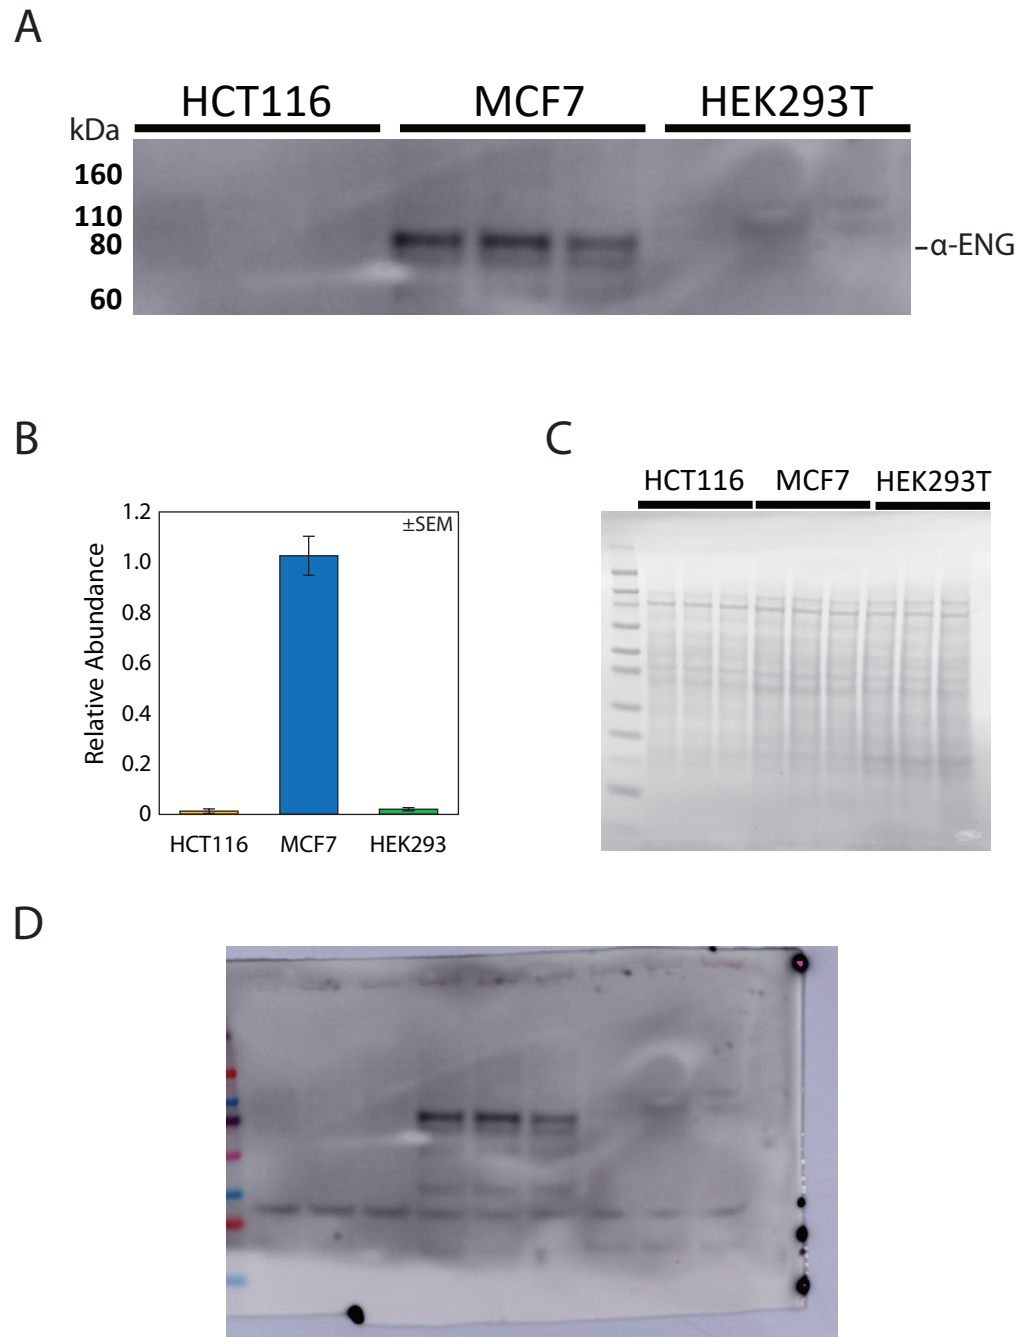

**Figure S7**

Western blotting analysis of Endoglin (ENG) abundance across three cell lines. **A.** Western blot for ENG revealed strong expression in MCF7 cells as seen in the RTS-MS3 analysis but not the SPS-MS3 analysis (n=3). Molecular weights (kDa) are shown. **B.** Quantitation of relative abundance of ENG across the cell lines in **A.** Error bars represent standard error of the mean (SEM) for the quantified lanes. **C.** Ponceau S staining of the PVDF membrane used in **A** demonstrating equal loading of each cell line. **D.** Image of the entire blotted membrane in **A.**



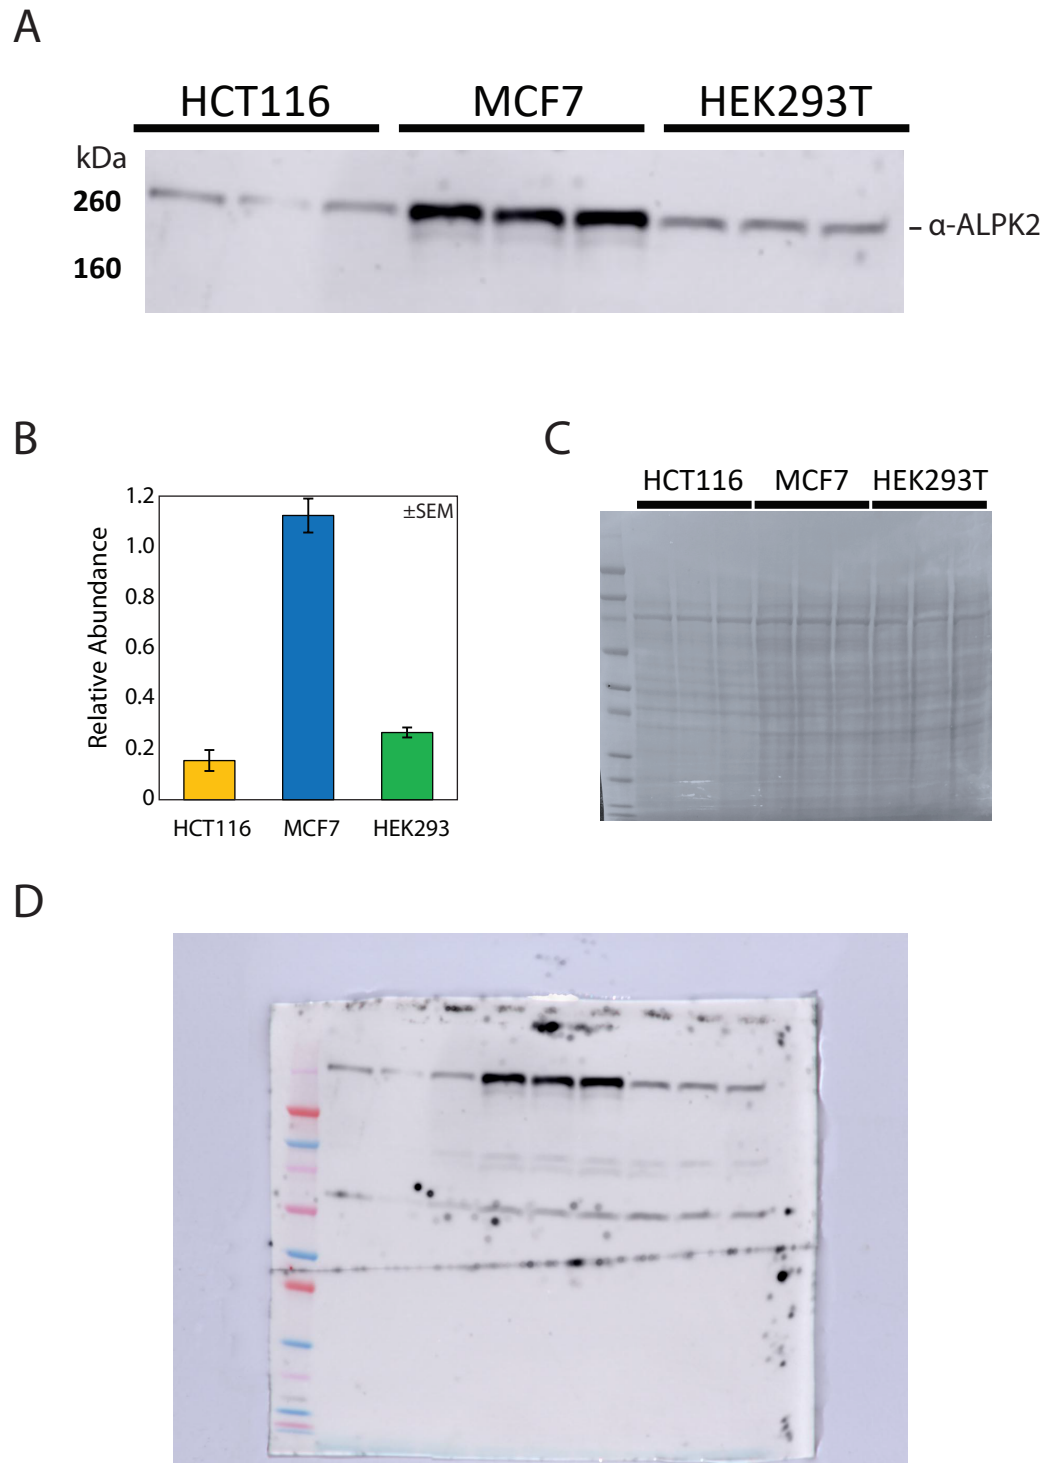

**Figure S8**

Western blotting analysis of ALPK2 abundance across three cell lines. **A.** Western blot for ALPK2 revealed strong expression in MCF7 cells as seen in the RTS-MS3 analysis but not the SPS-MS3 analysis (n=3). Molecular weights (kDa) are shown. **B.** Quantitation of relative abundance of ALPK2 across the cell lines in **A.** Error bars represent standard error of the mean (SEM) for the quantified lanes. **C.** Ponceau S staining of the PVDF membrane used in **A** demonstrating equal loading of each cell line. **D.** Image of the entire blotted membrane in **A.**
